# Supplementary material for: Aggregation-enhanced FRET-active conjugated polymer nanoparticles for picric acid sensing in aqueous solution
Source: Royal Society of Chemistry journal article supplement (doi:10.1039/c7tc05015a), 2017-12-01
Supplement: c7tc05015a1.pdf [file c7tc05015a1.pdf]

**Electronic Supplementary Information**

for

**Aggregation-Enhanced FRET-Active Conjugated Polymer  
Nanoparticles for Picric Acid Sensing in Aqueous Solution**

Taisheng Wang,<sup>a</sup> Na Zhang,<sup>a</sup> Ruke Bai<sup>\*a</sup> and Yinyin Bao<sup>\*b</sup>

<sup>a</sup> CAS Key Laboratory of Soft Matter Chemistry, Department of Polymer Science and Engineering, University of Science and Technology of China, Hefei 230026, P. R. China.

\*E-mail: [bairk@ustc.edu.cn](mailto:bairk@ustc.edu.cn)

<sup>b</sup> Institute of Pharmaceutical Sciences, Department of Chemistry and Applied Biosciences,

ETH Zürich, 8093 Zürich, Switzerland. \*Email: [baoyinyin@mail.ustc.edu.cn](mailto:baoyinyin@mail.ustc.edu.cn);

[yinyin.bao@pharma.ethz.ch](mailto:yinyin.bao@pharma.ethz.ch)

## Supplementary figures

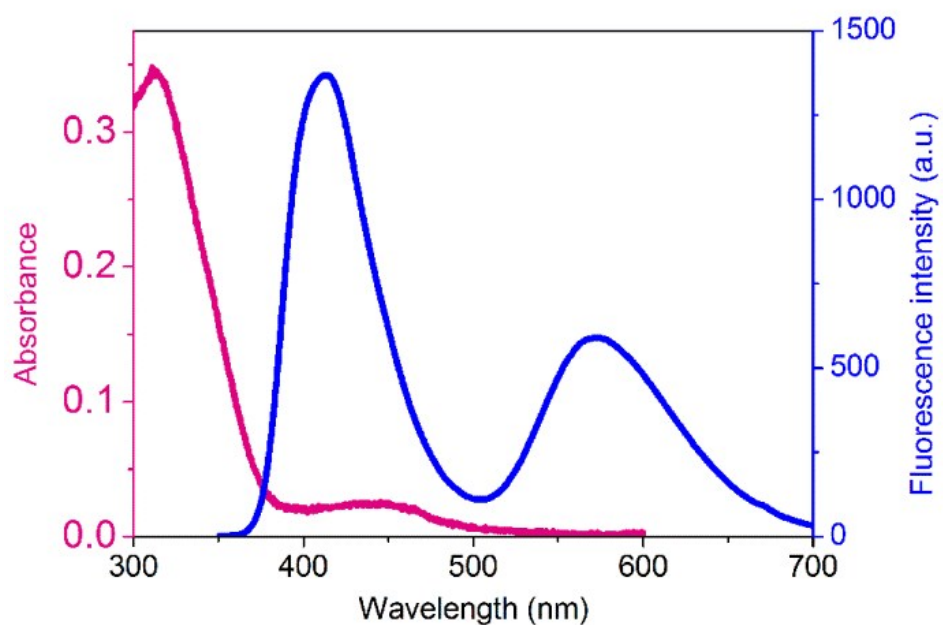

Figure S1. UV-vis absorbance spectrum and fluorescence spectra of P1 in dioxane.  $[P1] = 8.0 \mu\text{M}$ .  $\lambda_{\text{ex}} = 333 \text{ nm}$ .

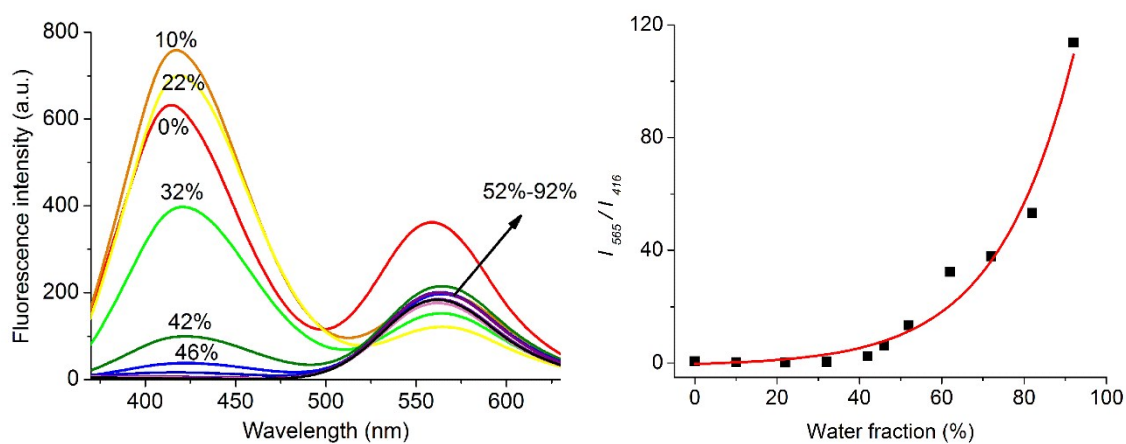

Figure S2. Fluorescence spectra of P1 in dioxane- $\text{H}_2\text{O}$  mixture solutions (left) and intensity ratio  $I_{565\text{nm}}/I_{416\text{nm}}$  of P1 in the presence of increasing water content (right).  $[P1] = 8.0 \mu\text{M}$ .  $\lambda_{\text{ex}} = 333 \text{ nm}$ .

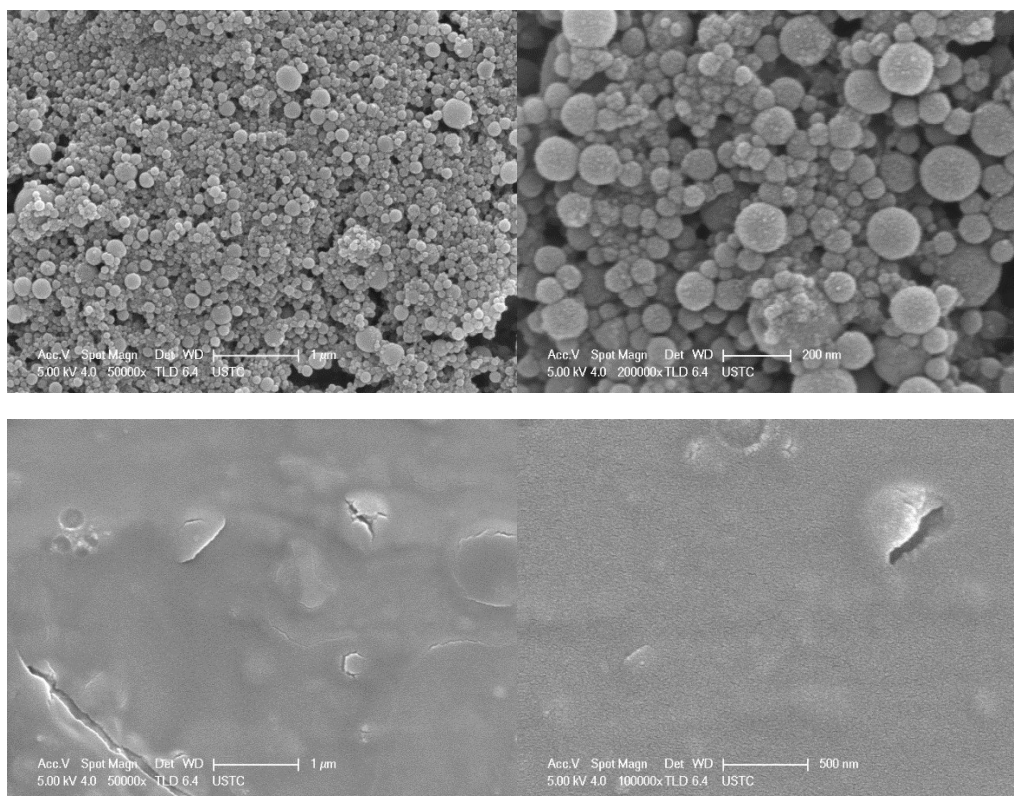

Figure S3. Scanning electron microscope (SEM) images of P1 in aqueous solution (top) and dioxane (down)

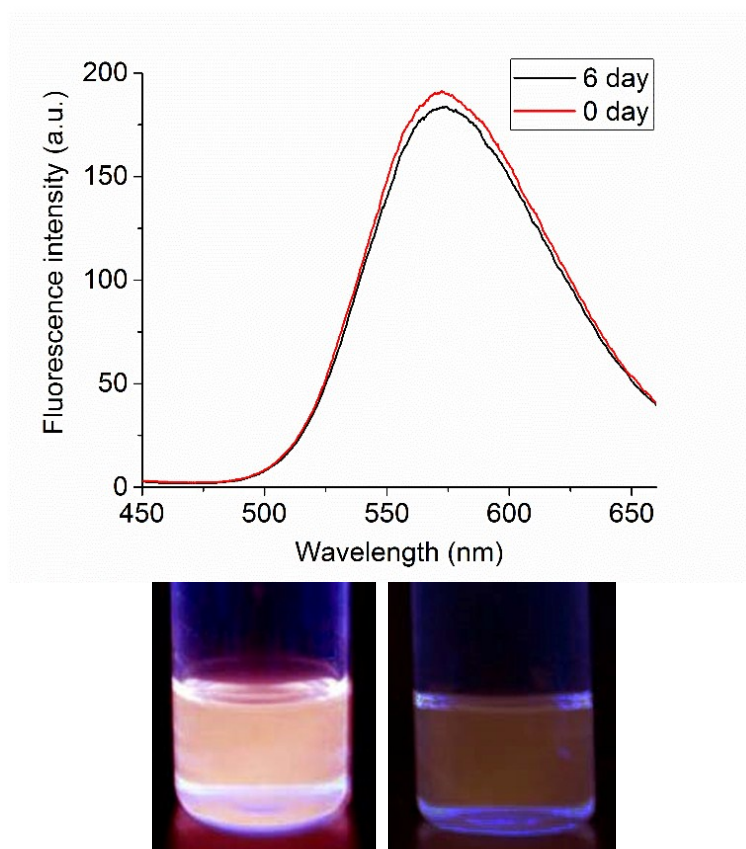

Figure S4. Fluorescence spectra of **P1** before and after 6 days in aqueous solution. [**P1**] = 6.0 mg/mL.  $\lambda_{\text{ex}}$  = 333 nm (top) and photos of **P1** solutions before and after addition of 150  $\mu\text{M}$  PA under UV lamp (365 nm). [**P1**] = 8.0  $\mu\text{M}$  (down).

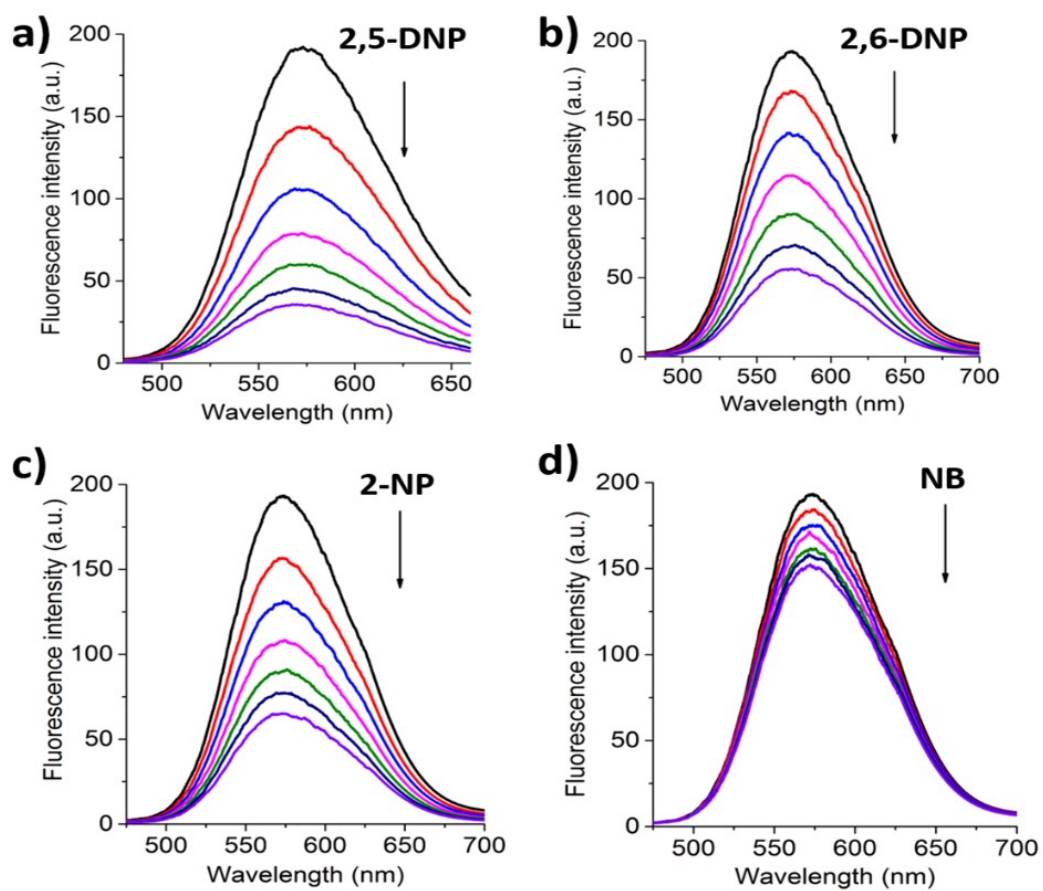

Figure S5. Fluorescence spectra of **P1** in presence of nitroaromatics with varied concentrations ranged from 0 to 300 $\mu\text{M}$  in aqueous solution. [**P1**] = 8.0  $\mu\text{M}$ .  $\lambda_{\text{ex}}$  = 333 nm.
